# Supplementary material for: First Comprehensive Analysis of Both Mitochondrial Characteristics and Mitogenome-Based Phylogenetics in the Subfamily Eumeninae (Hymenoptera: Vespidae)
Source: MDPI journal article supplement (doi:10.3390/insects13060529), 2022-06-08
Supplement: s1 [file s1]

[illegible]

0 0 0 0

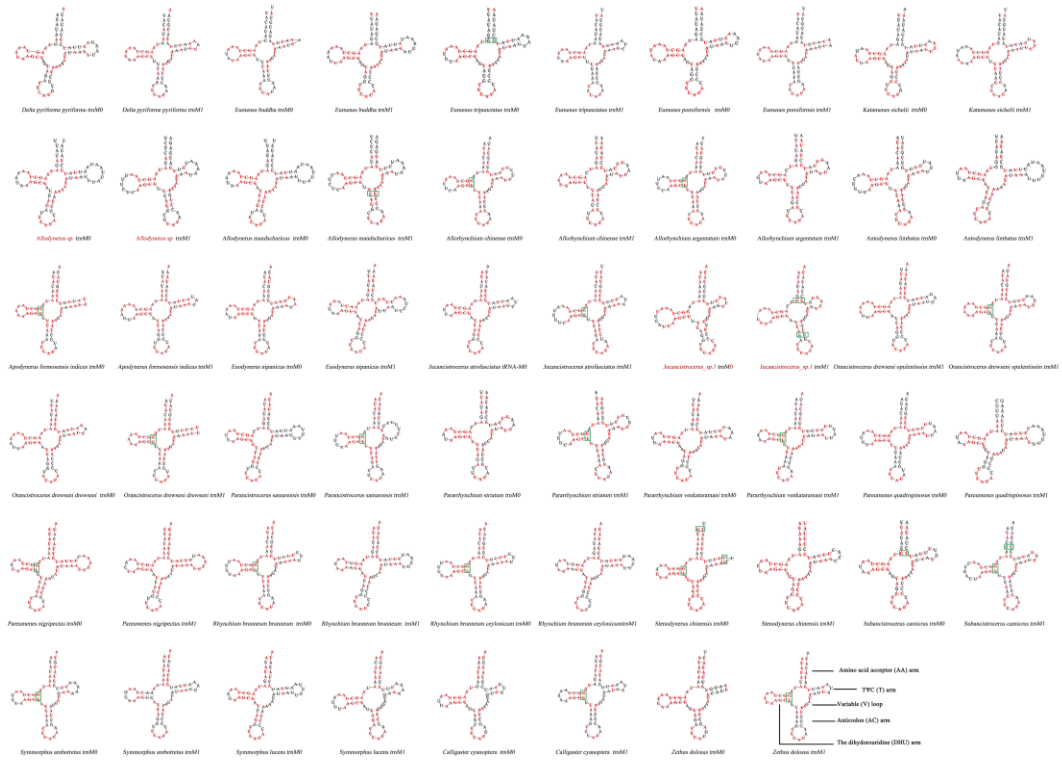

**Figure S2.** Inferred secondary structures of duplicated *trnM*. The substitutions in *trnM0* and *trnM1* compared with each other are indicated by red color.

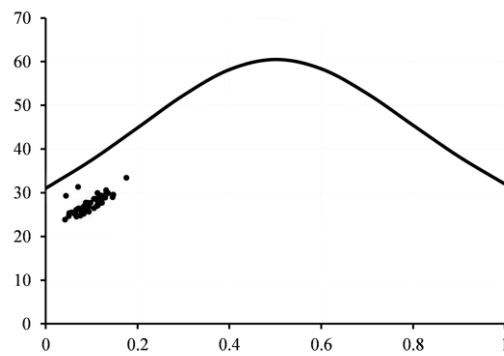

**Figure S3.** ENC-GC<sub>3S</sub> plot of total PCGs in 54 eumenine mitogenomes, the black curve shows the relationship between ENC values and GC<sub>3S</sub> under random codon usage assumption.

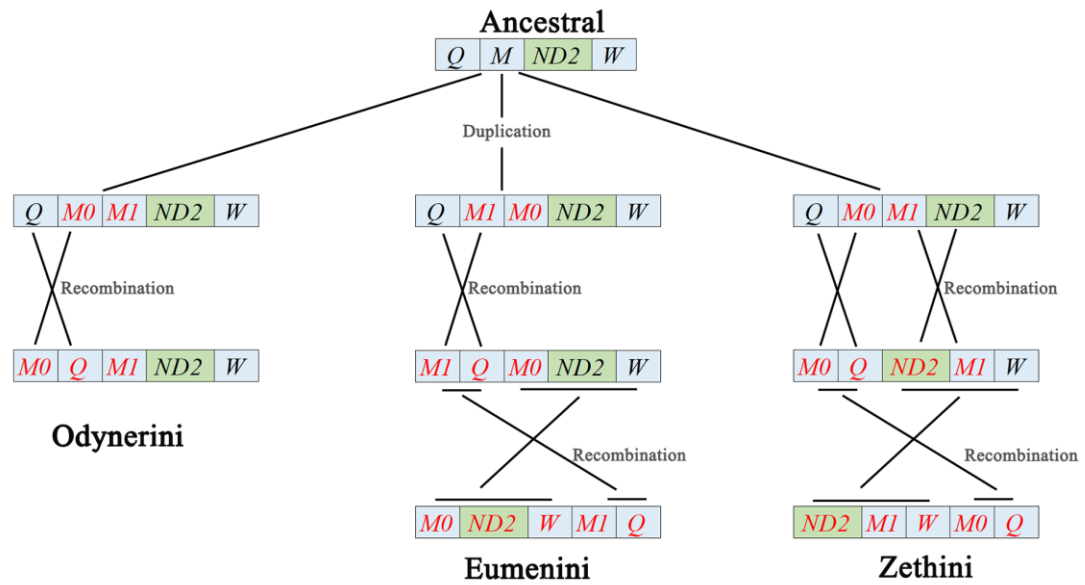

Figure S4. The hypothesized pathway of the translocated inversion derived by recombination and duplication in three tribes of the subfamily Eumeninae.

The red genes represent their positions changed.

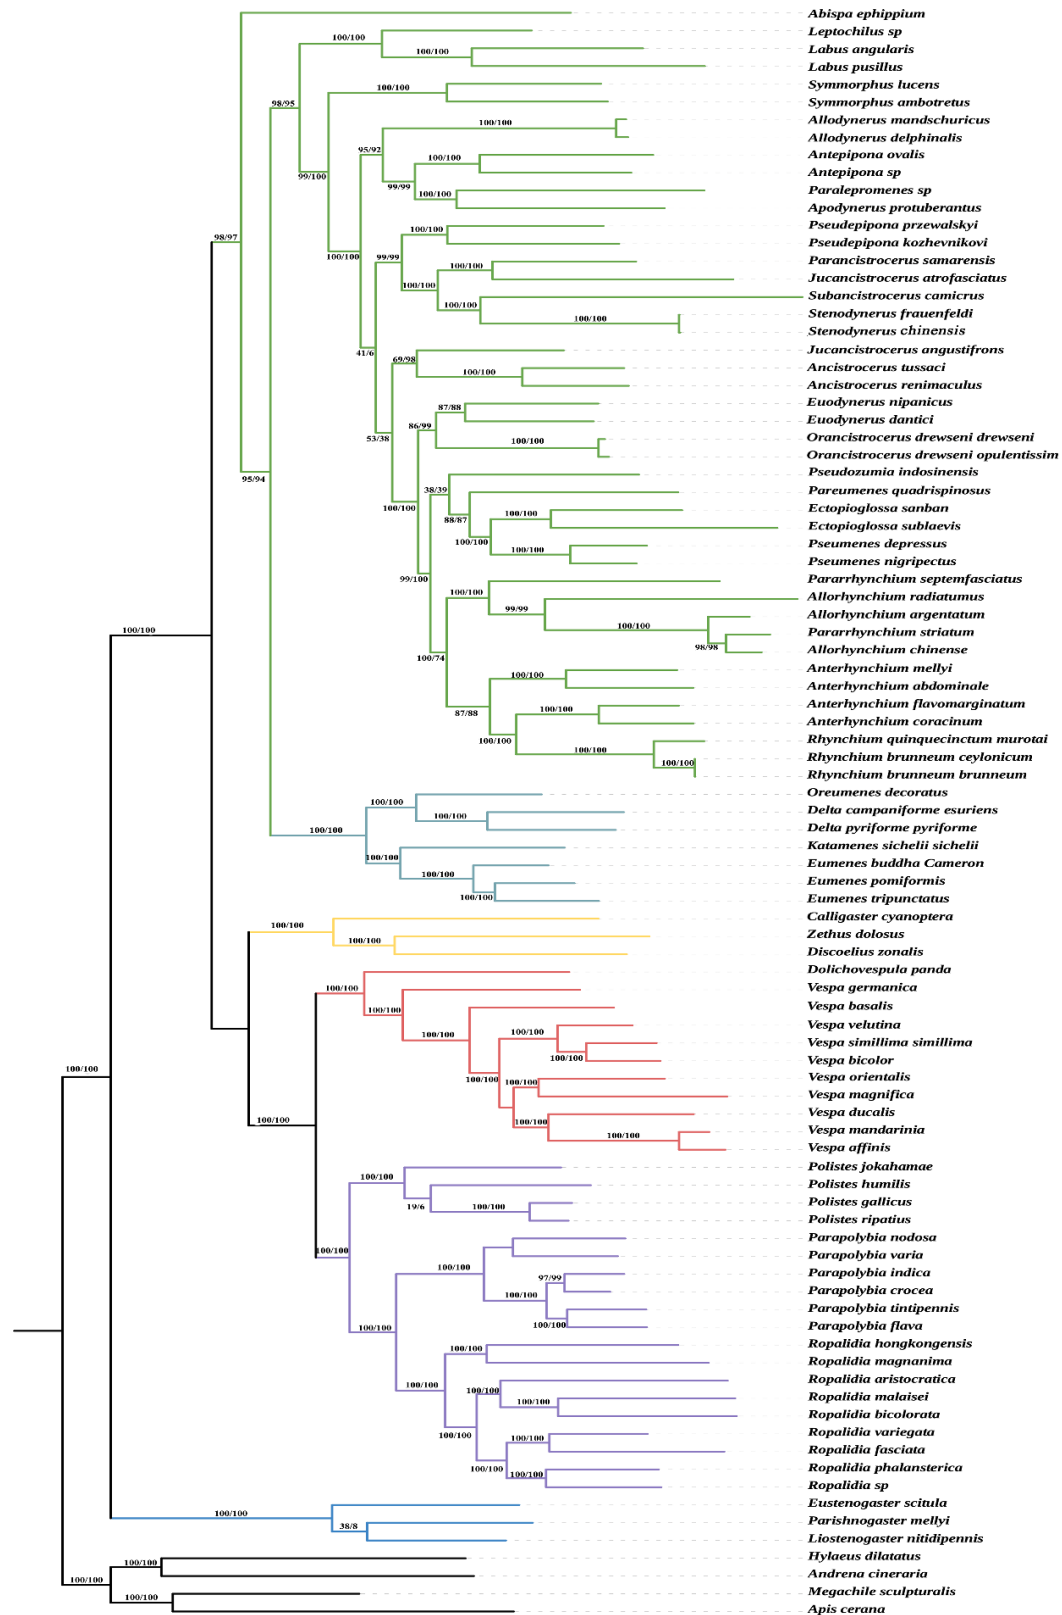

**Figure S5.** Phylogenetic trees of the Vespidae inferred from PCG and PCGR by ML. Each nod shows the bootstrap support (BS) values.

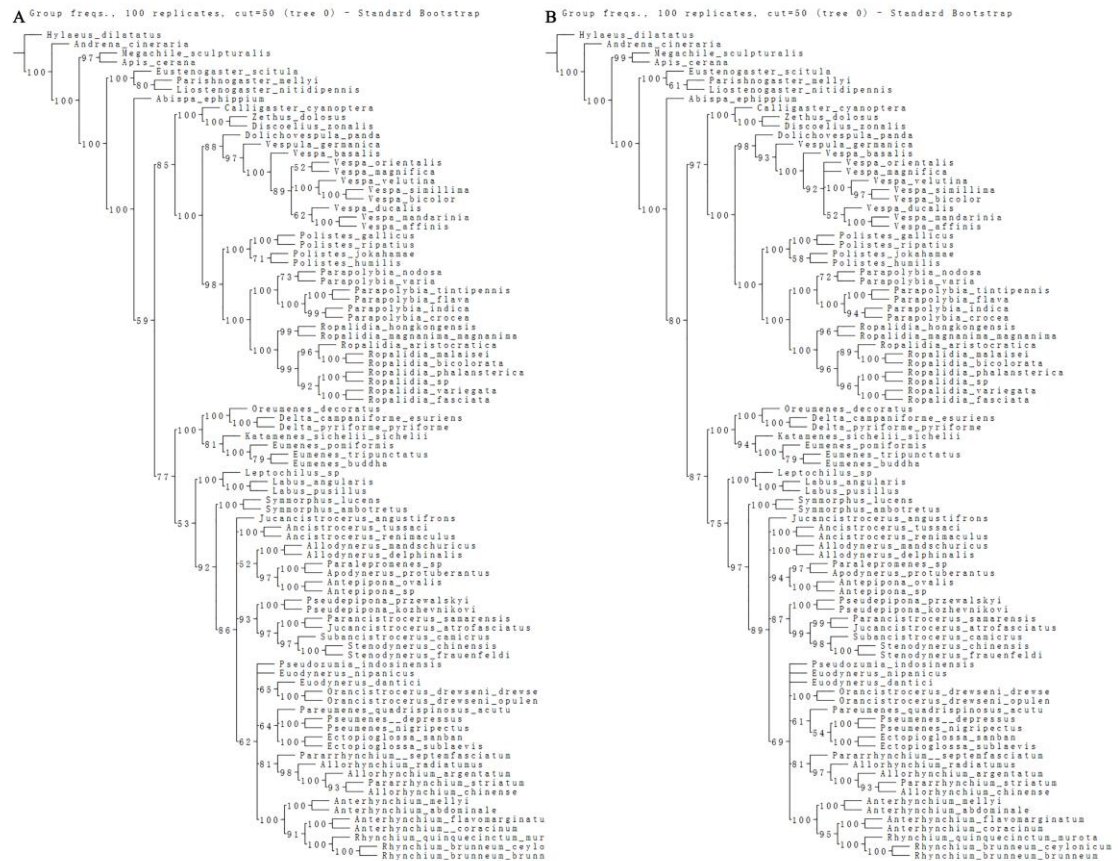

**Figure S6.** Phylogenetic trees of the Vespidae. A): Phylogenetic tree of the Vespidae inferred from PCG by MP. B): Phylogenetic tree of the Vespidae inferred from PCGR by MP. Each node shows the bootstrap support values.

**Table S1.** Mitochondrial genomes used for phylogenetic analysis in this study.

| Family   | Subfamily      | Species                             | Accession No. | Group   |
|----------|----------------|-------------------------------------|---------------|---------|
| Vespidae | Stenogastrinae | <i>Eustenogaster scitula</i>        | KY856830      | Ingroup |
|          |                | <i>Liostenogaster rnitidipennis</i> | MH910629      |         |
|          |                | <i>Parishnogaster mellyi</i>        | MH910630      |         |
|          | Vespinae       | <i>Vespula germanica</i>            | KR703583      |         |
|          |                | <i>Vespa mandarinia</i>             | NC_027172     |         |
|          |                | <i>Vespa bicolor</i>                | KJ735511      |         |
|          |                | <i>Vespa velutina</i>               | NC_035146     |         |
|          |                | <i>Vespa orientalis</i>             | KY563657      |         |
|          |                | <i>Vespa magnifica</i>              | MT137097      |         |
|          |                | <i>Vespa ducalis</i>                | KX950825      |         |
|          |                | <i>Vespa basalis</i>                | MK440075      |         |
|          |                | <i>Vespa affinis</i>                | NC_039134     |         |
|          |                | <i>Vespa simillima simillima</i>    | NC_046020     |         |

|  |            |                                      |           |  |
|--|------------|--------------------------------------|-----------|--|
|  |            | <i>Dolichovespula panda</i>          | NC_036067 |  |
|  | Polistinae | <i>Ropalidia</i> sp                  | MK034142  |  |
|  |            | <i>Ropalidia phalansterica</i>       | MK034143  |  |
|  |            | <i>Ropalidia bicolorata</i>          | MK034144  |  |
|  |            | <i>Ropalidia fasciata</i>            | MK034145  |  |
|  |            | <i>Ropalidia magnanima</i>           | MK034146  |  |
|  |            | <i>Ropalidia hongkongensis</i>       | MK034147  |  |
|  |            | <i>Ropalidia variegata</i>           | MK034148  |  |
|  |            | <i>Ropalidia malaisei</i>            | MK034149  |  |
|  |            | <i>Ropalidia aristocratica</i>       | MK034150  |  |
|  |            | <i>Parapolybia varia</i>             | MH065751  |  |
|  |            | <i>Parapolybia tintipennis</i>       | MH065754  |  |
|  |            | <i>Parapolybia flava</i>             | MH065755  |  |
|  |            | <i>Parapolybia nodosa</i>            | MH065756  |  |
|  |            | <i>Parapolybia indica</i>            | MH065757  |  |
|  |            | <i>Parapolybia crocea</i>            | KY679828  |  |
|  |            | <i>Polists humilis</i>               | EU024653  |  |
|  |            | <i>Polistes jokahamae</i>            | KR052468  |  |
|  |            | <i>Polistes riparius</i>             | LC519884  |  |
|  |            | <i>Polistes gallicus</i>             | ON017795  |  |
|  | Eumeninae  | <i>Abispa ephippium</i>              | EU302588  |  |
|  |            | <i>Allodynerus delphinalis</i>       | ON024142  |  |
|  |            | <i>Allodynerus mandschuricus</i>     | ON012816  |  |
|  |            | <i>Allorhynchium chinense</i>        | MK051021  |  |
|  |            | <i>Allorhynchium argentatum</i>      | MK051022  |  |
|  |            | <i>Allorhynchium radiatumus</i>      | ON055163  |  |
|  |            | <i>Ancistrocerus renimaculus</i>     | ON045342  |  |
|  |            | <i>Ancistrocerus tussaci</i>         | ON012815  |  |
|  |            | <i>Antepipona</i> sp                 | ON012817  |  |
|  |            | <i>Antepipona ovalis</i>             | ON012818  |  |
|  |            | <i>Anterhynchium abdominale</i>      | MK051029  |  |
|  |            | <i>Anterhynchium coracinum</i>       | MK051028  |  |
|  |            | <i>Anterhynchium flavomarginatum</i> | MK051026  |  |
|  |            | <i>Anterhynchium mellyi</i>          | ON012812  |  |
|  |            | <i>Apodynerus protuberantus</i>      | ON045341  |  |
|  |            | <i>Calligaster cyanoptera</i>        | ON012814  |  |
|  |            | <i>Delta pyriforme pyriforme</i>     | ON076029  |  |
|  |            | <i>Delta campaniforme esuriens</i>   | ON055486  |  |
|  |            | <i>Discoelius zonalis</i>            | ON076025  |  |
|  |            | <i>Eumenes buddha</i> Cameron        | ON076024  |  |
|  |            | <i>Eumenes tripunctatus</i>          | ON045343  |  |
|  |            | <i>Eumenes pomiformis</i>            | ON076031  |  |
|  |            | <i>Ectoploglossa sublaevis</i>       | ON045340  |  |



|                |              |                                                      |          |          |
|----------------|--------------|------------------------------------------------------|----------|----------|
|                |              | <i>Ectoploglossa sanban</i>                          | ON012813 |          |
|                |              | <i>Euodynerus dantici</i>                            | ON076022 |          |
|                |              | <i>Euodynerus nipanicus</i>                          | ON076021 |          |
|                |              | <i>Jucancistrocerus atrofasciatus</i>                | ON045348 |          |
|                |              | <i>Jucancistrocerus angustifrons</i>                 | ON012819 |          |
|                |              | <i>Katamenes sichelii sichelii</i>                   | ON076027 |          |
|                |              | <i>Labus pusillus</i>                                | ON076026 |          |
|                |              | <i>Labus angularis</i>                               | ON076030 |          |
|                |              | <i>Leptochilus</i> sp                                | ON045339 |          |
|                |              | <i>Orancistrocerus aterrimus</i><br><i>aterrimus</i> | KY941926 |          |
|                |              | <i>Orancistrocerus drewseni</i><br><i>drewseni</i>   | ON045338 |          |
|                |              | <i>Oreumenes decorates</i>                           | ON076028 |          |
|                |              | <i>Paralepromenes</i> sp                             | ON045337 |          |
|                |              | <i>Parancistrocerus samarensis</i>                   | ON076023 |          |
|                |              | <i>Pararrhynchium striatum</i>                       | ON045347 |          |
|                |              | <i>Pararrhynchium septemfasciatus</i>                | ON055487 |          |
|                |              | <i>Pareumenes quadrispinosus</i><br><i>acutus</i>    | ON076020 |          |
|                |              | <i>Pseudepipona kozhevnikovi</i>                     | ON076019 |          |
|                |              | <i>Pseudepipona przewalskyi</i>                      | ON024141 |          |
|                |              | <i>Pseudozumia indosinensis</i>                      | ON045335 |          |
|                |              | <i>Pseumenes nigripectus</i>                         | ON045336 |          |
|                |              | <i>Pseumenes depressus</i>                           | ON045346 |          |
|                |              | <i>Rhynchium quinquecinctum</i><br><i>murotai</i>    | MK051030 |          |
|                |              | <i>Rhynchium brunneum brunneum</i>                   | MK051031 |          |
|                |              | <i>Rhynchium brunneum</i><br><i>ceylonicum</i>       | MK051032 |          |
|                |              | <i>Stenodynerus frauenfeldi</i>                      | ON045334 |          |
|                |              | <i>Stenodynerus chinensis</i>                        | ON045345 |          |
|                |              | <i>Subancistrocerus camicrus</i>                     | ON045344 |          |
|                |              | <i>Symmorphus ambotretus</i>                         | ON076018 |          |
|                |              | <i>Symmorphus lucens</i>                             | ON076017 |          |
|                |              | <i>Zethus dolosus</i>                                | ON076016 |          |
| <b>Apoidea</b> | Megachilidae | <i>Megachile sculpturalis</i>                        | NC028017 | Outgroup |
|                | Andrenidae   | <i>Andrena cineraria</i>                             | KT164628 |          |
|                | Colletidae   | <i>Hylaeus dilatatus</i>                             | NC026468 |          |
|                | Apidae       | <i>Apis cerana</i>                                   | NC014295 |          |

**Table S2.** The best partitioning scheme selected by PartitionFinder for different data matrices.

| Data matrices        | Optimal Partition | Model   | Initial Partition                                                    |
|----------------------|-------------------|---------|----------------------------------------------------------------------|
| PCG-codon partition  | Partition 1       | GTR+I+G | <i>a6p1, c1p1, cbp1, c3p1, a8p1, c2p1, n1p1, n5p1, n4p1, n4lp1</i>   |
|                      | Partition 2       | GTR+I+G | <i>c1p3, n3p3, c2p3, c3p3, cbp3, a6p3, a8p3, n1p3, n4p3, n5p3</i>    |
|                      | Partition3        | GTR+I+G | <i>a8p2, n4p2, n1p2, n5p2, a6p2, n3p2, c1p2, c2p2, c3p2, cbp2</i>    |
|                      | Partition 4       | GTR+G   | <i>n2p1, n6p2, n2p2, n3p1, n6p1, n4lp2, n2p3, n6p3, n4lp3</i>        |
| PCGR-codon partition | Partition 1       | GTR+I+G | <i>c3p2, cbp2, a6p2, a8p2, n4p2, n1p2, c1p2, n3p2, c2p2, n5p2</i>    |
|                      | Partition 2       | GTR+I+G | <i>a6p1, c3p1, a8p1, c2p1, c1p1, cbp1, n1p1, n5p1, n4p1</i>          |
|                      | Partition 3       | GTR+I+G | <i>c3p3, cbp3, a6p3, a8p3, n4p3, n1p3, c1p3, n3p3, c2p3, n5p3</i>    |
|                      | Partition 4       | GTR+ G  | <i>n3p1, n6p1, n4lp1, n2p1, n6p2, n2p2, n4lp2, n6p3, n4lp3, n2p3</i> |
|                      | Partition 5       | GTR+G   | <i>rrnl, rrnS</i>                                                    |

*a6/8: atp6/8, c1/2/3: cox1/2/3, n1/2/3/4/4l/5/6: nd1/2/3/4/4l/5/6, cb: cytb*



**Table S3.** Base composition, total length (bp) and AT-skew of complete Eumeninae mitogenomes.

| Species                               | bp    | A    | C    | G   | T    | GC%  | AT%  | AT-skew |
|---------------------------------------|-------|------|------|-----|------|------|------|---------|
| <i>Allodynerus delphinalis</i>        | 16932 | 40.3 | 11.7 | 5.9 | 42.1 | 17.6 | 82.4 | -0.022  |
| <i>Allodynerus mandschuricus</i>      | 17449 | 40.3 | 11.5 | 5.9 | 42.2 | 17.4 | 82.5 | -0.023  |
| <i>Allorhynchium chinense</i>         | 16909 | 39   | 11.1 | 6.1 | 43.8 | 17.2 | 82.8 | -0.058  |
| <i>Allorhynchium argentatum</i>       | 17972 | 38.8 | 11.5 | 6.3 | 43.4 | 17.8 | 82.2 | -0.056  |
| <i>Antepipona</i> sp                  | 19040 | 41.6 | 11.7 | 6.7 | 40   | 18.4 | 81.6 | 0.020   |
| <i>Anterhynchium mellyi</i>           | 18692 | 39.9 | 11.8 | 7   | 41.4 | 18.8 | 81.3 | -0.018  |
| <i>Calligaster cyanoptera</i>         | 16316 | 40.9 | 11.9 | 6.4 | 40.8 | 18.3 | 81.7 | 0.001   |
| <i>Discoelius zonalis</i>             | 15435 | 41.5 | 14.2 | 6.6 | 37.7 | 20.8 | 79.2 | 0.048   |
| <i>Eumenes pomiformis</i>             | 16520 | 41.8 | 9.8  | 5.5 | 42.9 | 15.3 | 84.7 | -0.013  |
| <i>Ectopioglossa sanban</i>           | 16454 | 41.1 | 12.3 | 6.8 | 39.7 | 19.1 | 80.8 | 0.017   |
| <i>Euodynerus dantici</i>             | 17493 | 40   | 10.2 | 6.7 | 43.1 | 16.9 | 83.1 | -0.037  |
| <i>Euodynerus nipanicus</i>           | 22088 | 39.1 | 9.8  | 7.7 | 43.4 | 17.5 | 82.5 | -0.052  |
| <i>Jucancistrocerus atrofasciatus</i> | 18848 | 37.7 | 15   | 7.5 | 40.2 | 22.5 | 77.9 | -0.032  |
| <i>Jucancistrocerus angustifrons</i>  | 19867 | 39.5 | 9.3  | 6.6 | 44.6 | 15.9 | 84.1 | -0.061  |
| <i>Oreumenes decorates</i>            | 15563 | 42.4 | 9.5  | 5.9 | 42.2 | 15.4 | 84.6 | 0.002   |
| <i>Parancistrocerus samarensis</i>    | 17773 | 39.5 | 11.3 | 6.3 | 42.9 | 17.6 | 82.4 | -0.041  |
| <i>Pararrhynchium striatum</i>        | 20403 | 37.1 | 10.5 | 8.4 | 44   | 18.9 | 81.1 | -0.085  |
| <i>Para.septemfasciatus</i>           | 18003 | 39.6 | 11.8 | 8.3 | 40.3 | 20.1 | 79.9 | -0.008  |
| <i>Pareumenes quadrispinosus</i>      | 17426 | 40.9 | 11.6 | 8.2 | 39.2 | 19.8 | 80.1 | 0.021   |
| <i>Pseudepipona przewalskyi</i>       | 20281 | 38.1 | 8.8  | 8.4 | 44.7 | 17.2 | 82.8 | -0.080  |
| <i>Pseumenes nigripectus</i>          | 17773 | 39.6 | 11.4 | 5.9 | 43.1 | 17.3 | 82.7 | -0.042  |
| <i>Pseumenes depressus</i>            | 16677 | 43.2 | 11.2 | 6.1 | 39.6 | 17.3 | 82.8 | 0.043   |
| <i>Rhynchium brunneum</i>             | 23251 | 36.7 | 9.3  | 7.7 | 46.3 | 17   | 83   | -0.116  |
| <i>Rh. brunneum ceylonicum</i>        | 23122 | 36.8 | 9.4  | 7.6 | 46.2 | 17   | 83   | -0.113  |
| <i>Stenodynerus chinensis</i>         | 17194 | 40.1 | 12.8 | 6.3 | 40.9 | 19.1 | 81   | -0.010  |
| <i>Subancistrocerus camicrus</i>      | 18035 | 39   | 14.7 | 6.7 | 39.6 | 21.4 | 78.6 | -0.008  |
| <i>Symmorphus ambotretus</i>          | 17280 | 40.2 | 14.3 | 6.5 | 39   | 20.8 | 79.2 | 0.015   |
| <i>Symmorphus lucens</i>              | 17865 | 40   | 13.7 | 6.3 | 40.1 | 20   | 80.1 | -0.001  |
| <i>Zethus dolosus</i>                 | 16306 | 41.1 | 13.3 | 6.5 | 39.1 | 19.8 | 80.2 | 0.025   |

**Table S4.** Substitution saturation test results.

| Data partition | Iss   | Iss.cSym† | Psym‡  | Iss.cAsym§ | Pasym¶ |
|----------------|-------|-----------|--------|------------|--------|
| PCG            | 0.387 | 0.7532    | 0.0000 | 0.5684     | 0.0000 |
| PCG+RNA        | 0.342 | 0.7489    | 0.0000 | 0.5640     | 0.0000 |

†Index of substitution saturation assuming a symmetrical true tree.

‡Probability of significant difference between Iss and Iss.cSym (two-tailed test).

§Index of substitution saturation assuming an asymmetrical true tree.

¶Probability of significant difference between Iss and Iss.cAsym (two-tailed test).
